# Supplementary material for: Preorganization of N,O-hybrid phosphine oxide chelators for effective extraction of trivalent Am/Eu ions – a computational study
Source: Royal Society of Chemistry journal article supplement (doi:10.1039/d1nj06029e), 2022-01-01
Supplement: d1nj06029e1.pdf [file d1nj06029e1.pdf]

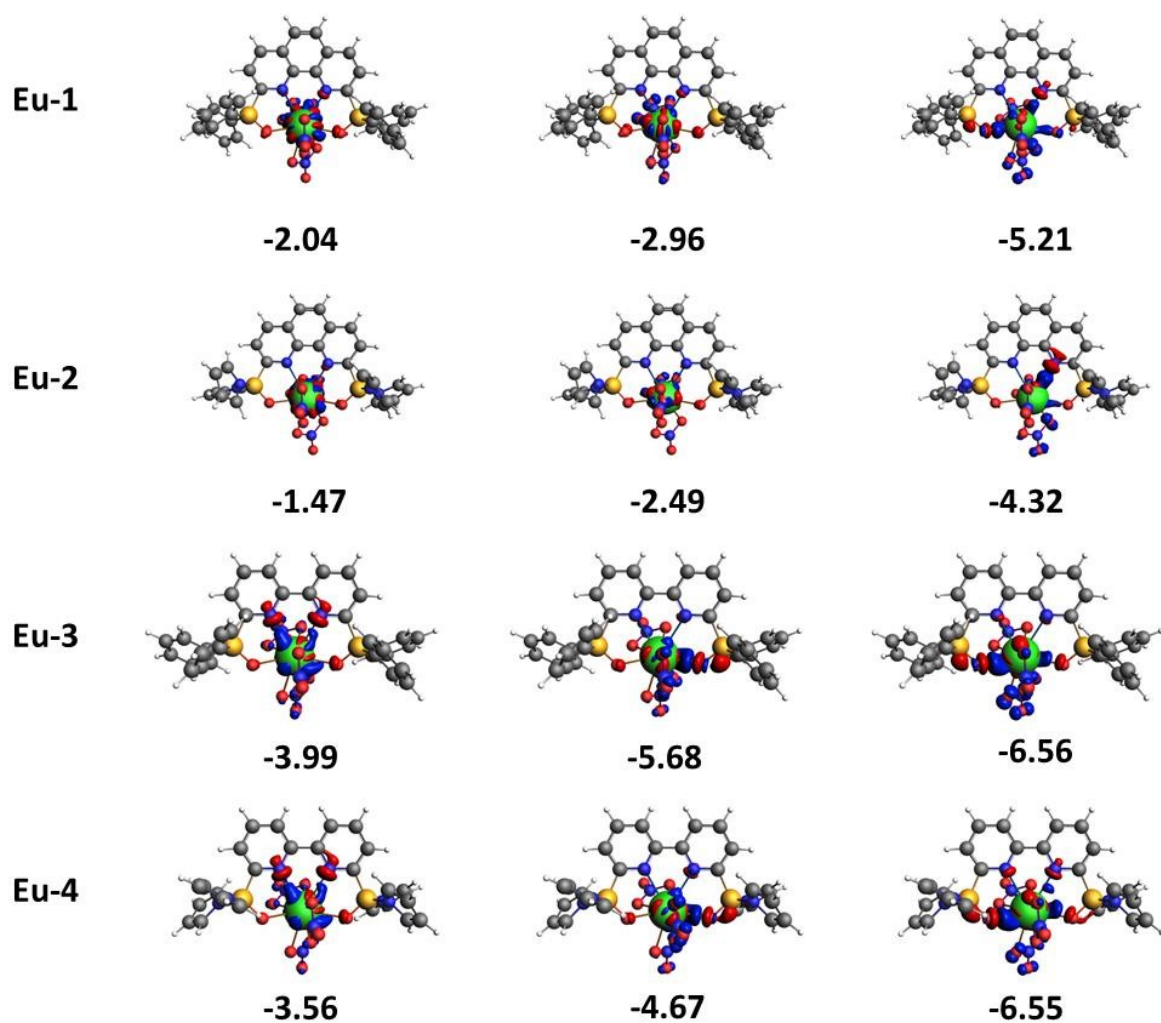

Figure 1 Natural orbitals for the chemical valence (NOCVs) for the four [EuL(NO<sub>3</sub>)<sub>3</sub>] complexes. The corresponding orbital energy (kcal mol<sup>-1</sup>) contribution for each NOCV pair is also presented.

Table 1. Computed bond parameters of  $ML_2NO_3$  complexes where M= Am/Eu; L= 1-4

| Complexes | M-O <sub>1</sub> | M-N <sub>1</sub> | M-N <sub>2</sub> | M-O <sub>2</sub> | P <sub>1</sub> C <sub>1</sub> C <sub>2</sub> P <sub>2</sub> | M-O <sub>3</sub> | M-N <sub>3</sub> | M-N <sub>4</sub> | M-O <sub>4</sub> | P <sub>3</sub> C <sub>3</sub> C <sub>4</sub> P <sub>4</sub> |
|-----------|------------------|------------------|------------------|------------------|-------------------------------------------------------------|------------------|------------------|------------------|------------------|-------------------------------------------------------------|
| Am-1      | 2.455            | 2.786            | 2.818            | 2.457            | 7.134                                                       | 2.544            | 2.972            | 2.976            | 2.463            | 5.111                                                       |
| Eu-1      | 2.472            | 2.811            | 2.791            | 2.444            | 6.158                                                       | 2.467            | 3.013            | 3.003            | 2.522            | 3.597                                                       |
| Am-2      | 2.548            | 2.759            | 2.738            | 2.482            | 1.514                                                       | 2.504            | 2.841            | 2.805            | 2.601            | 13.330                                                      |
| Eu-2      | 2.520            | 2.696            | 2.757            | 2.570            | 2.628                                                       | 2.546            | 2.899            | 2.847            | 2.600            | 14.687                                                      |
| Am-3      | 2.416            | 2.848            | 2.805            | 2.455            | 25.467                                                      | 2.437            | 3.011            | 3.014            | 2.526            | 13.957                                                      |
| Eu-3      | 2.443            | 2.842            | 2.815            | 2.477            | 25.466                                                      | 2.442            | 3.059            | 3.051            | 2.502            | 11.059                                                      |
| Am-4      | 2.472            | 2.758            | 2.746            | 2.569            | 14.270                                                      | 2.581            | 2.787            | 2.820            | 2.512            | 7.159                                                       |
| Eu-4      | 2.568            | 2.774            | 2.755            | 2.507            | 9.402                                                       | 2.576            | 2.860            | 2.911            | 2.530            | 14.217                                                      |

Table 2. Mulliken charges on the oxygen, nitrogen, and metal ions in the  $ML_2NO_3$  complexes where M=Am/Eu.

| Complexes | O1     | N1     | N2     | O2     | O3     | N3     | N4     | O4     | M      |
|-----------|--------|--------|--------|--------|--------|--------|--------|--------|--------|
| Am-1      | -0.842 | -0.368 | -0.383 | -0.825 | -0.826 | -0.386 | -0.383 | -0.823 | +1.500 |
| Eu-1      | -0.858 | -0.386 | -0.420 | -0.844 | -0.851 | -0.399 | -0.393 | -0.846 | +1.663 |
| Am-2      | -0.814 | -0.388 | -0.397 | -0.803 | -0.792 | -0.412 | -0.397 | -0.796 | +1.424 |
| Eu-2      | -0.826 | -0.403 | -0.417 | -0.820 | -0.809 | -0.426 | -0.407 | -0.814 | +1.557 |
| Am-3      | -0.843 | -0.368 | -0.373 | -0.828 | -0.830 | -0.389 | -0.373 | -0.827 | +1.514 |
| Eu-3      | -0.858 | -0.388 | -0.382 | -0.845 | -0.854 | -0.397 | -0.382 | -0.852 | +1.685 |
| Am-4      | -0.811 | -0.391 | -0.408 | -0.799 | -0.796 | -0.416 | -0.408 | -0.797 | +1.393 |
| Eu-4      | -0.825 | -0.405 | -0.422 | -0.821 | -0.811 | -0.426 | -0.408 | -0.815 | +1.561 |

Table 3. QTAIM analysis of electron density  $\rho(\text{e}/\text{bohr}^3)$  at Metal–Nitrogen and Metal–Oxygen Bond Critical Points of the  $\text{ML}_2\text{NO}_3$  complexes.

| Complexes | M-O <sub>1</sub> | M-N <sub>1</sub> | M-N <sub>2</sub> | M-O <sub>2</sub> | M-O <sub>3</sub> | M-N <sub>3</sub> | M-N <sub>4</sub> | M-O <sub>4</sub> |
|-----------|------------------|------------------|------------------|------------------|------------------|------------------|------------------|------------------|
| Am-1      | 0.051            | 0.015            | 0.030            | 0.054            | 0.049            | 0.020            | 0.020            | 0.042            |
| Eu-1      | 0.041            | 0.024            | 0.025            | 0.043            | 0.036            | 0.016            | 0.015            | 0.040            |
| Am-2      | 0.042            | 0.033            | 0.034            | 0.048            | 0.045            | 0.027            | 0.029            | 0.036            |
| Eu-2      | 0.032            | 0.026            | 0.026            | 0.036            | 0.030            | 0.022            | 0.020            | 0.033            |
| Am-3      | 0.051            | 0.027            | 0.029            | 0.056            | 0.052            | 0.018            | 0.018            | 0.043            |
| Eu-3      | 0.038            | 0.022            | 0.024            | 0.043            | 0.038            | 0.014            | 0.014            | 0.043            |
| Am-4      | 0.040            | 0.034            | 0.032            | 0.048            | 0.044            | 0.028            | 0.030            | 0.044            |
| Eu-4      | 0.032            | 0.026            | 0.027            | 0.037            | 0.031            | 0.031            | 0.019            | 0.034            |

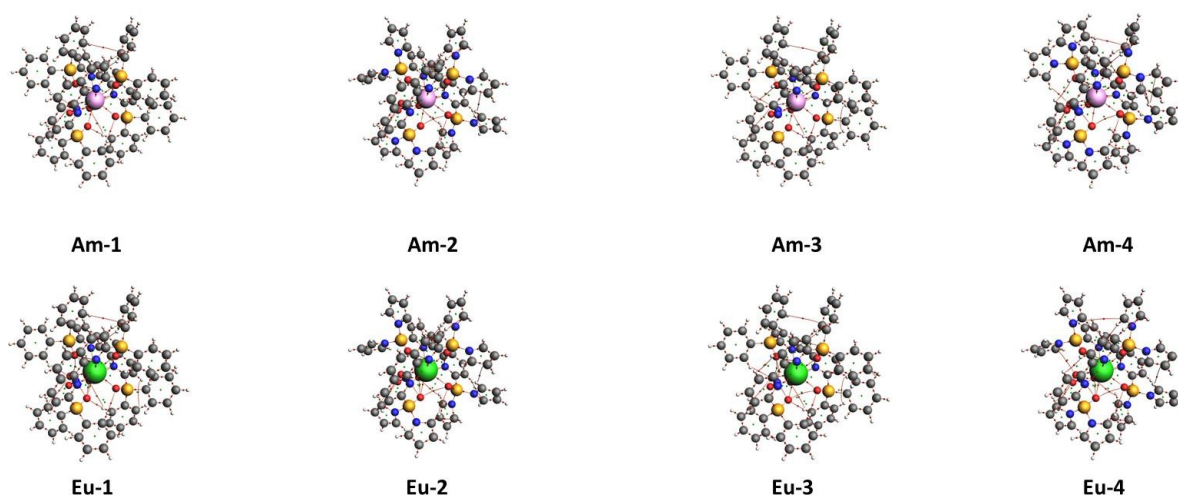

Figure 2: AIM molecular graphs of  $ML_2NO_3$  complexes where red colour circles indicate BCPs while RCPs are represented by green colour circles.

# Ligand 1

|      |         |         |         |
|------|---------|---------|---------|
| 1 H  | 5.8855  | 20.9837 | 7.9361  |
| 2 C  | 7.8815  | 21.7806 | 7.8501  |
| 3 H  | 8.3048  | 20.9675 | 7.2720  |
| 4 C  | 8.6917  | 22.8647 | 8.2511  |
| 5 C  | 6.4463  | 25.0795 | 10.0662 |
| 6 N  | 8.2464  | 23.8976 | 8.9548  |
| 7 C  | 6.9457  | 23.9305 | 9.3115  |
| 8 N  | 7.2934  | 26.0855 | 10.3683 |
| 9 C  | 6.8274  | 27.1388 | 11.0341 |
| 10 C | 5.4866  | 27.2597 | 11.4591 |
| 11 H | 5.1517  | 28.1380 | 11.9977 |
| 12 C | 4.6096  | 26.2322 | 11.1606 |
| 13 H | 3.5685  | 26.2860 | 11.4646 |
| 14 C | 5.0702  | 25.1071 | 10.4431 |
| 15 C | 4.1987  | 24.0196 | 10.0837 |
| 16 H | 3.1570  | 24.0703 | 10.3865 |
| 17 C | 4.6639  | 22.9548 | 9.3733  |
| 18 H | 4.0007  | 22.1396 | 9.0988  |
| 19 C | 6.0424  | 22.8829 | 8.9663  |
| 20 C | 6.5488  | 21.7962 | 8.2176  |
| 21 P | 8.0720  | 28.4866 | 11.2306 |
| 22 P | 10.4730 | 22.8751 | 7.7945  |
| 23 O | 10.8320 | 21.6823 | 6.9481  |
| 24 O | 8.5793  | 28.9701 | 9.8980  |
| 25 C | 11.4225 | 22.9001 | 9.3537  |
| 26 C | 11.1799 | 23.8193 | 10.3897 |

|    |   |         |         |         |
|----|---|---------|---------|---------|
| 27 | C | 11.9641 | 23.7884 | 11.5455 |
| 28 | C | 12.9924 | 22.8471 | 11.6776 |
| 29 | C | 13.2352 | 21.9304 | 10.6500 |
| 30 | C | 12.4524 | 21.9552 | 9.4911  |
| 31 | H | 10.3764 | 24.5432 | 10.3032 |
| 32 | H | 11.7715 | 24.4992 | 12.3426 |
| 33 | H | 13.5996 | 22.8284 | 12.5777 |
| 34 | H | 14.0296 | 21.1965 | 10.7482 |
| 35 | H | 12.6352 | 21.2435 | 8.6930  |
| 36 | C | 10.8100 | 24.4485 | 6.9297  |
| 37 | C | 11.5655 | 24.3733 | 5.7475  |
| 38 | C | 11.8966 | 25.5381 | 5.0475  |
| 39 | C | 11.4739 | 26.7835 | 5.5229  |
| 40 | C | 10.7163 | 26.8626 | 6.6978  |
| 41 | C | 10.3833 | 25.7030 | 7.4034  |
| 42 | H | 11.8894 | 23.4055 | 5.3786  |
| 43 | H | 12.4809 | 25.4710 | 4.1346  |
| 44 | H | 11.7315 | 27.6883 | 4.9801  |
| 45 | H | 10.3821 | 27.8280 | 7.0664  |
| 46 | H | 9.7808  | 25.7740 | 8.3029  |
| 47 | C | 9.3967  | 27.8308 | 12.2909 |
| 48 | C | 9.1595  | 26.8875 | 13.3035 |
| 49 | C | 10.2062 | 26.4714 | 14.1322 |
| 50 | C | 11.4935 | 26.9891 | 13.9497 |
| 51 | C | 11.7375 | 27.9187 | 12.9323 |
| 52 | C | 10.6931 | 28.3399 | 12.1050 |
| 53 | H | 8.1677  | 26.4700 | 13.4479 |

|      |         |         |         |
|------|---------|---------|---------|
| 54 H | 10.0174 | 25.7420 | 14.9136 |
| 55 H | 12.3056 | 26.6639 | 14.5933 |
| 56 H | 12.7376 | 28.3138 | 12.7822 |
| 57 H | 10.8825 | 29.0577 | 11.3129 |
| 58 C | 7.2593  | 29.8320 | 12.1573 |
| 59 C | 7.0739  | 29.7974 | 13.5498 |
| 60 C | 6.4403  | 30.8600 | 14.2000 |
| 61 C | 5.9919  | 31.9649 | 13.4669 |
| 62 C | 6.1791  | 32.0079 | 12.0813 |
| 63 C | 6.8107  | 30.9457 | 11.4276 |
| 64 H | 7.4261  | 28.9524 | 14.1330 |
| 65 H | 6.3024  | 30.8275 | 15.2764 |
| 66 H | 5.5032  | 32.7908 | 13.9755 |
| 67 H | 5.8382  | 32.8661 | 11.5102 |
| 68 H | 6.9644  | 30.9811 | 10.3539 |



## Ligand 2

|      |         |         |         |
|------|---------|---------|---------|
| 1 H  | 5.7597  | 21.2025 | 7.7826  |
| 2 C  | 7.7930  | 21.8999 | 7.7443  |
| 3 H  | 8.1911  | 21.0608 | 7.1865  |
| 4 C  | 8.6363  | 22.9494 | 8.1626  |
| 5 C  | 6.4619  | 25.2652 | 9.9336  |
| 6 N  | 8.2288  | 24.0102 | 8.8483  |
| 7 C  | 6.9249  | 24.1030 | 9.1753  |
| 8 N  | 7.3479  | 26.2192 | 10.2828 |
| 9 C  | 6.9102  | 27.2688 | 10.9734 |
| 10 C | 5.5684  | 27.4555 | 11.3643 |
| 11 H | 5.2646  | 28.3318 | 11.9242 |
| 12 C | 4.6515  | 26.4821 | 11.0093 |
| 13 H | 3.6066  | 26.5785 | 11.2865 |
| 14 C | 5.0793  | 25.3528 | 10.2795 |
| 15 C | 4.1669  | 24.3112 | 9.8872  |
| 16 H | 3.1223  | 24.4074 | 10.1670 |
| 17 C | 4.5998  | 23.2303 | 9.1821  |
| 18 H | 3.9078  | 22.4467 | 8.8888  |
| 19 C | 5.9828  | 23.0968 | 8.8076  |
| 20 C | 6.4533  | 21.9842 | 8.0762  |
| 21 P | 8.1998  | 28.5136 | 11.3024 |
| 22 P | 10.4093 | 22.8456 | 7.7768  |
| 23 O | 10.8243 | 21.6137 | 7.0626  |
| 24 O | 8.8682  | 29.0694 | 10.1002 |
| 25 H | 13.5561 | 22.0671 | 11.4141 |
| 26 H | 10.2750 | 25.7552 | 14.7827 |

|    |   |         |         |         |
|----|---|---------|---------|---------|
| 27 | H | 6.0910  | 31.1686 | 14.8454 |
| 28 | H | 12.6061 | 25.8141 | 4.6162  |
| 29 | N | 7.4740  | 29.7574 | 12.2149 |
| 30 | C | 6.9201  | 30.9117 | 11.6469 |
| 31 | C | 6.2943  | 31.6200 | 12.6424 |
| 32 | C | 6.4541  | 30.8852 | 13.8667 |
| 33 | C | 7.1721  | 29.7504 | 13.5816 |
| 34 | H | 7.0399  | 31.1170 | 10.5940 |
| 35 | N | 9.2801  | 27.7705 | 12.3792 |
| 36 | C | 10.5736 | 28.2526 | 12.6247 |
| 37 | C | 11.1288 | 27.4958 | 13.6246 |
| 38 | C | 10.1551 | 26.5167 | 14.0243 |
| 39 | C | 9.0353  | 26.7033 | 13.2552 |
| 40 | H | 10.9703 | 29.0779 | 12.0530 |
| 41 | N | 10.8035 | 24.2389 | 6.8757  |
| 42 | C | 10.4149 | 25.5671 | 7.0939  |
| 43 | C | 11.0969 | 26.3618 | 6.2058  |
| 44 | C | 11.9429 | 25.5104 | 5.4153  |
| 45 | C | 11.7520 | 24.2207 | 5.8437  |
| 46 | H | 9.6822  | 25.8073 | 7.8492  |
| 47 | N | 11.2388 | 22.9857 | 9.2640  |
| 48 | C | 11.0860 | 23.9566 | 10.2613 |
| 49 | C | 12.0046 | 23.7013 | 11.2497 |
| 50 | C | 12.7569 | 22.5406 | 10.8591 |
| 51 | C | 12.2751 | 22.1218 | 9.6440  |
| 52 | H | 10.3214 | 24.7143 | 10.1803 |
| 53 | H | 12.5592 | 21.2961 | 9.0104  |

|      |         |         |         |
|------|---------|---------|---------|
| 54 H | 12.1866 | 23.2890 | 5.5161  |
| 55 H | 12.1218 | 24.2766 | 12.1584 |
| 56 H | 5.7882  | 32.5676 | 12.5152 |
| 57 H | 7.5084  | 28.9479 | 14.2210 |
| 58 H | 12.1270 | 27.6181 | 14.0233 |
| 59 H | 8.0965  | 26.1718 | 13.2370 |
| 60 H | 10.9982 | 27.4359 | 6.1220  |

### Ligand 3

|      |         |         |         |
|------|---------|---------|---------|
| 1 H  | 5.8406  | 21.2404 | 7.3882  |
| 2 C  | 7.8797  | 21.9367 | 7.5516  |
| 3 H  | 8.3072  | 21.2071 | 6.8735  |
| 4 C  | 8.6880  | 22.8985 | 8.1655  |
| 5 C  | 6.4427  | 24.9573 | 10.1891 |
| 6 N  | 8.2235  | 23.8246 | 9.0100  |
| 7 C  | 6.9107  | 23.8604 | 9.2803  |
| 8 N  | 7.2288  | 26.0412 | 10.2786 |
| 9 C  | 6.8434  | 27.0617 | 11.0572 |
| 10 C | 5.6521  | 27.0574 | 11.7903 |
| 11 H | 5.3663  | 27.9048 | 12.4021 |
| 12 C | 4.8388  | 25.9226 | 11.7119 |
| 13 H | 3.9122  | 25.8702 | 12.2737 |
| 14 C | 5.2355  | 24.8596 | 10.9061 |
| 15 H | 6.4943  | 30.7127 | 10.1077 |
| 16 H | 5.3164  | 32.5796 | 11.2354 |
| 17 H | 5.3771  | 32.7726 | 13.7163 |
| 18 H | 6.6302  | 31.0958 | 15.0603 |
| 19 C | 6.0193  | 22.9333 | 8.7102  |
| 20 C | 6.5131  | 21.9609 | 7.8426  |
| 21 P | 8.0304  | 28.4774 | 11.0387 |
| 22 P | 10.4923 | 22.9514 | 7.8172  |
| 23 O | 10.9013 | 21.8737 | 6.8478  |
| 24 O | 8.4087  | 28.8913 | 9.6424  |
| 25 C | 11.3349 | 22.7619 | 9.4247  |
| 26 C | 11.1311 | 23.6382 | 10.5052 |

|    |   |         |         |         |
|----|---|---------|---------|---------|
| 27 | C | 11.8051 | 23.4278 | 11.7105 |
| 28 | C | 12.6860 | 22.3479 | 11.8473 |
| 29 | C | 12.8922 | 21.4749 | 10.7749 |
| 30 | C | 12.2185 | 21.6798 | 9.5659  |
| 31 | H | 10.4396 | 24.4688 | 10.4143 |
| 32 | H | 11.6423 | 24.1068 | 12.5417 |
| 33 | H | 13.2074 | 22.1883 | 12.7867 |
| 34 | H | 13.5742 | 20.6358 | 10.8764 |
| 35 | H | 12.3738 | 21.0031 | 8.7321  |
| 36 | C | 10.8622 | 24.6203 | 7.1762  |
| 37 | C | 11.7238 | 24.6919 | 6.0685  |
| 38 | C | 12.0647 | 25.9322 | 5.5201  |
| 39 | C | 11.5479 | 27.1081 | 6.0741  |
| 40 | C | 10.6867 | 27.0416 | 7.1757  |
| 41 | C | 10.3413 | 25.8051 | 7.7287  |
| 42 | H | 12.1172 | 23.7780 | 5.6354  |
| 43 | H | 12.7289 | 25.9772 | 4.6619  |
| 44 | H | 11.8113 | 28.0712 | 5.6465  |
| 45 | H | 10.2750 | 27.9481 | 7.6099  |
| 46 | H | 9.6530  | 25.7677 | 8.5669  |
| 47 | C | 9.4561  | 27.9312 | 12.0295 |
| 48 | C | 9.3276  | 27.0230 | 13.0930 |
| 49 | C | 10.4471 | 26.6663 | 13.8506 |
| 50 | C | 11.7004 | 27.2085 | 13.5462 |
| 51 | C | 11.8359 | 28.1050 | 12.4801 |
| 52 | C | 10.7182 | 28.4671 | 11.7233 |
| 53 | H | 8.3628  | 26.5863 | 13.3324 |

|    |   |         |         |         |
|----|---|---------|---------|---------|
| 54 | H | 10.3402 | 25.9642 | 14.6720 |
| 55 | H | 12.5699 | 26.9283 | 14.1335 |
| 56 | H | 12.8093 | 28.5201 | 12.2369 |
| 57 | H | 10.8237 | 29.1568 | 10.8917 |
| 58 | C | 7.2190  | 29.8365 | 11.9454 |
| 59 | C | 7.2585  | 29.9558 | 13.3444 |
| 60 | C | 6.5945  | 31.0103 | 13.9786 |
| 61 | C | 5.8912  | 31.9538 | 13.2216 |
| 62 | C | 5.8556  | 31.8457 | 11.8268 |
| 63 | C | 6.5169  | 30.7920 | 11.1899 |
| 64 | H | 7.8073  | 29.2361 | 13.9434 |
| 65 | H | 4.9574  | 22.9829 | 8.9204  |
| 66 | H | 4.6262  | 23.9655 | 10.8464 |

#### Ligand 4

|      |         |         |         |
|------|---------|---------|---------|
| 1 H  | 5.7269  | 21.4475 | 7.1499  |
| 2 C  | 7.7880  | 22.0265 | 7.4376  |
| 3 H  | 8.2146  | 21.2638 | 6.7968  |
| 4 C  | 8.6031  | 22.9507 | 8.0960  |
| 5 C  | 6.3608  | 25.1297 | 9.9886  |
| 6 N  | 8.1468  | 23.9132 | 8.9035  |
| 7 C  | 6.8242  | 24.0205 | 9.0930  |
| 8 N  | 7.2104  | 26.1485 | 10.1788 |
| 9 C  | 6.8341  | 27.1573 | 10.9766 |
| 10 C | 5.5983  | 27.2229 | 11.6246 |
| 11 H | 5.3353  | 28.0623 | 12.2575 |
| 12 C | 4.7136  | 26.1579 | 11.4290 |
| 13 H | 3.7448  | 26.1520 | 11.9162 |
| 14 C | 5.0963  | 25.1015 | 10.6090 |
| 15 H | 7.8943  | 29.0706 | 14.0601 |
| 16 H | 12.3438 | 27.9015 | 13.3613 |
| 17 H | 8.3441  | 26.2040 | 13.0810 |
| 18 H | 10.9324 | 27.6104 | 6.6207  |
| 19 C | 5.9205  | 23.1405 | 8.4682  |
| 20 C | 6.4093  | 22.1338 | 7.6398  |
| 21 P | 8.0839  | 28.4740 | 11.0876 |
| 22 P | 10.4024 | 22.8804 | 7.8585  |
| 23 O | 10.8884 | 21.7222 | 7.0697  |
| 24 O | 8.5584  | 29.0067 | 9.7872  |
| 25 H | 13.1536 | 21.7004 | 11.7035 |
| 26 H | 10.7000 | 25.9736 | 14.3882 |

|    |   |         |         |         |
|----|---|---------|---------|---------|
| 27 | H | 6.5126  | 31.2779 | 14.8003 |
| 28 | H | 12.8525 | 26.1957 | 5.2831  |
| 29 | N | 7.4285  | 29.7219 | 12.0498 |
| 30 | C | 6.7196  | 30.8103 | 11.5261 |
| 31 | C | 6.2626  | 31.5683 | 12.5754 |
| 32 | C | 6.6921  | 30.9338 | 13.7907 |
| 33 | C | 7.3985  | 29.8078 | 13.4467 |
| 34 | H | 6.6268  | 30.9427 | 10.4589 |
| 35 | N | 9.3298  | 27.8282 | 12.0416 |
| 36 | C | 10.6107 | 28.3921 | 12.1241 |
| 37 | C | 11.3168 | 27.7085 | 13.0808 |
| 38 | C | 10.4532 | 26.6945 | 13.6207 |
| 39 | C | 9.2466  | 26.7860 | 12.9755 |
| 40 | H | 10.8923 | 29.2150 | 11.4842 |
| 41 | N | 10.8388 | 24.3607 | 7.1312  |
| 42 | C | 10.3342 | 25.6466 | 7.3706  |
| 43 | C | 11.0876 | 26.5400 | 6.6500  |
| 44 | C | 12.0981 | 25.7973 | 5.9485  |
| 45 | C | 11.9312 | 24.4713 | 6.2600  |
| 46 | H | 9.4909  | 25.7939 | 8.0288  |
| 47 | N | 11.1237 | 22.8988 | 9.4063  |
| 48 | C | 10.9894 | 23.8583 | 10.4164 |
| 49 | C | 11.7936 | 23.4883 | 11.4661 |
| 50 | C | 12.4500 | 22.2625 | 11.1036 |
| 51 | C | 12.0274 | 21.9209 | 9.8433  |
| 52 | H | 10.3181 | 24.6950 | 10.2986 |
| 53 | H | 12.2799 | 21.0867 | 9.2075  |



|      |         |         |         |
|------|---------|---------|---------|
| 54 H | 12.4691 | 23.5921 | 5.9405  |
| 55 H | 11.8980 | 24.0319 | 12.3954 |
| 56 H | 5.6934  | 32.4841 | 12.4879 |
| 57 H | 4.8525  | 23.2481 | 8.6125  |
| 58 H | 4.4286  | 24.2604 | 10.4665 |

Am-1

|    |   |         |         |         |
|----|---|---------|---------|---------|
| 1  | H | 6.6808  | 20.3829 | 9.3742  |
| 2  | C | 8.4851  | 21.3092 | 8.6658  |
| 3  | H | 8.8857  | 20.4065 | 8.2194  |
| 4  | C | 9.2048  | 22.5179 | 8.6109  |
| 5  | C | 7.0349  | 24.9152 | 10.2876 |
| 6  | N | 8.7624  | 23.6582 | 9.1465  |
| 7  | C | 7.5513  | 23.6644 | 9.7594  |
| 8  | N | 7.7702  | 26.0461 | 10.1365 |
| 9  | C | 7.2485  | 27.2129 | 10.5275 |
| 10 | C | 5.9883  | 27.3203 | 11.1453 |
| 11 | H | 5.5977  | 28.2855 | 11.4445 |
| 12 | C | 5.2508  | 26.1707 | 11.3511 |
| 13 | H | 4.2781  | 26.2152 | 11.8295 |
| 14 | C | 5.7534  | 24.9294 | 10.9038 |
| 15 | C | 5.0011  | 23.7112 | 11.0296 |
| 16 | H | 4.0333  | 23.7511 | 11.5184 |
| 17 | C | 5.4826  | 22.5399 | 10.5302 |
| 18 | H | 4.9077  | 21.6233 | 10.6111 |
| 19 | C | 6.7582  | 22.4893 | 9.8699  |
| 20 | C | 7.2617  | 21.2965 | 9.3058  |
| 21 | P | 8.2913  | 28.6853 | 10.0875 |
| 22 | P | 10.8689 | 22.6555 | 7.8080  |
| 23 | O | 11.3963 | 24.0522 | 8.1517  |
| 24 | O | 9.5601  | 28.1390 | 9.4286  |
| 25 | C | 10.6535 | 22.3832 | 6.0227  |
| 26 | C | 9.4260  | 22.6687 | 5.3994  |

|      |         |         |         |
|------|---------|---------|---------|
| 27 C | 9.3092  | 22.5676 | 4.0113  |
| 28 C | 10.4139 | 22.1896 | 3.2410  |
| 29 C | 11.6397 | 21.9111 | 3.8560  |
| 30 C | 11.7632 | 22.0065 | 5.2431  |
| 31 H | 8.5643  | 22.9695 | 5.9859  |
| 32 H | 8.3588  | 22.7841 | 3.5344  |
| 33 H | 10.3204 | 22.1127 | 2.1621  |
| 34 H | 12.4971 | 21.6191 | 3.2581  |
| 35 H | 12.7172 | 21.7896 | 5.7122  |
| 36 C | 11.9542 | 21.3594 | 8.4775  |
| 37 C | 12.8674 | 21.7175 | 9.4846  |
| 38 C | 13.6904 | 20.7426 | 10.0532 |
| 39 C | 13.6024 | 19.4138 | 9.6252  |
| 40 C | 12.6957 | 19.0554 | 8.6208  |
| 41 C | 11.8735 | 20.0245 | 8.0432  |
| 42 H | 12.9382 | 22.7499 | 9.8105  |
| 43 H | 14.3996 | 21.0208 | 10.8264 |
| 44 H | 14.2438 | 18.6588 | 10.0695 |
| 45 H | 12.6334 | 18.0262 | 8.2827  |
| 46 H | 11.1867 | 19.7394 | 7.2524  |
| 47 C | 8.6923  | 29.6824 | 11.5583 |
| 48 C | 10.0469 | 29.8061 | 11.9091 |
| 49 C | 10.4135 | 30.5909 | 13.0057 |
| 50 C | 9.4333  | 31.2465 | 13.7563 |
| 51 C | 8.0820  | 31.1233 | 13.4104 |
| 52 C | 7.7089  | 30.3483 | 12.3111 |
| 53 H | 10.8033 | 29.2954 | 11.3236 |

|    |    |         |         |         |
|----|----|---------|---------|---------|
| 54 | H  | 11.4617 | 30.6900 | 13.2698 |
| 55 | H  | 9.7203  | 31.8568 | 14.6072 |
| 56 | H  | 7.3217  | 31.6368 | 13.9899 |
| 57 | H  | 6.6599  | 30.2843 | 12.0412 |
| 58 | C  | 7.2958  | 29.7077 | 8.9549  |
| 59 | C  | 6.4716  | 29.0884 | 7.9974  |
| 60 | C  | 5.8042  | 29.8613 | 7.0459  |
| 61 | C  | 5.9590  | 31.2524 | 7.0404  |
| 62 | C  | 6.7811  | 31.8727 | 7.9867  |
| 63 | C  | 7.4506  | 31.1052 | 8.9425  |
| 64 | H  | 6.3504  | 28.0098 | 7.9871  |
| 65 | H  | 5.1672  | 29.3795 | 6.3113  |
| 66 | H  | 5.4392  | 31.8518 | 6.2993  |
| 67 | H  | 6.9031  | 32.9512 | 7.9809  |
| 68 | H  | 8.0891  | 31.5939 | 9.6702  |
| 69 | Am | 10.3357 | 25.8331 | 9.3837  |
| 70 | O  | 10.9992 | 26.8328 | 7.0754  |
| 71 | N  | 9.8888  | 26.6132 | 6.4876  |
| 72 | O  | 8.9874  | 26.0221 | 7.1699  |
| 73 | O  | 9.6955  | 26.9544 | 5.3165  |
| 74 | O  | 12.3896 | 27.3710 | 9.6256  |
| 75 | N  | 13.1753 | 26.5537 | 10.2159 |
| 76 | O  | 12.7163 | 25.3884 | 10.4395 |
| 77 | O  | 14.3172 | 26.8830 | 10.5503 |
| 78 | O  | 10.3810 | 26.5273 | 11.9528 |
| 79 | N  | 10.2923 | 25.3451 | 12.4148 |
| 80 | O  | 10.1526 | 24.4038 | 11.5631 |

81 O 10.3348 25.1142 13.6284

## Am-2

|      |         |         |         |
|------|---------|---------|---------|
| 1 H  | 6.7345  | 20.3480 | 9.5207  |
| 2 C  | 8.5036  | 21.2791 | 8.7330  |
| 3 H  | 8.8830  | 20.3812 | 8.2598  |
| 4 C  | 9.2150  | 22.4893 | 8.6584  |
| 5 C  | 7.1261  | 24.8777 | 10.4393 |
| 6 N  | 8.8025  | 23.6277 | 9.2254  |
| 7 C  | 7.6212  | 23.6280 | 9.8859  |
| 8 N  | 7.8454  | 26.0063 | 10.2464 |
| 9 C  | 7.3421  | 27.1684 | 10.6777 |
| 10 C | 6.1400  | 27.2730 | 11.3973 |
| 11 H | 5.7956  | 28.2327 | 11.7646 |
| 12 C | 5.4123  | 26.1189 | 11.6296 |
| 13 H | 4.4790  | 26.1562 | 12.1807 |
| 14 C | 5.8792  | 24.8870 | 11.1261 |
| 15 C | 5.1357  | 23.6654 | 11.2796 |
| 16 H | 4.1955  | 23.6993 | 11.8196 |
| 17 C | 5.5904  | 22.4992 | 10.7456 |
| 18 H | 5.0198  | 21.5822 | 10.8479 |
| 19 C | 6.8337  | 22.4511 | 10.0242 |
| 20 C | 7.3104  | 21.2627 | 9.4316  |
| 21 P | 8.3346  | 28.6141 | 10.1487 |
| 22 P | 10.8155 | 22.6528 | 7.7851  |
| 23 O | 11.4097 | 23.9961 | 8.1308  |
| 24 O | 9.6853  | 28.1492 | 9.6690  |
| 25 N | 10.4926 | 22.3563 | 6.1527  |
| 26 O | 9.0111  | 26.0781 | 7.3349  |

|    |    |         |         |         |
|----|----|---------|---------|---------|
| 27 | O  | 12.4843 | 27.2649 | 9.7156  |
| 28 | N  | 13.2697 | 26.3983 | 10.2358 |
| 29 | O  | 12.7807 | 25.2352 | 10.4178 |
| 30 | O  | 14.4289 | 26.6764 | 10.5414 |
| 31 | O  | 9.7056  | 27.0204 | 5.4805  |
| 32 | O  | 10.5079 | 26.4562 | 12.0258 |
| 33 | N  | 10.3984 | 25.2709 | 12.4835 |
| 34 | O  | 10.2272 | 24.3432 | 11.6193 |
| 35 | O  | 10.4503 | 25.0282 | 13.6895 |
| 36 | N  | 11.8891 | 21.4145 | 8.1972  |
| 37 | O  | 11.0394 | 26.8403 | 7.2122  |
| 38 | N  | 9.9132  | 26.6576 | 6.6383  |
| 39 | N  | 7.5003  | 29.4239 | 8.9159  |
| 40 | N  | 8.3793  | 29.7134 | 11.4356 |
| 41 | Am | 10.4154 | 25.7875 | 9.4816  |
| 42 | C  | 9.2824  | 22.6665 | 5.4970  |
| 43 | C  | 9.4992  | 22.5962 | 4.1497  |
| 44 | C  | 10.8821 | 22.2560 | 3.9407  |
| 45 | C  | 11.4742 | 22.1266 | 5.1659  |
| 46 | H  | 8.3887  | 22.8950 | 6.0564  |
| 47 | H  | 8.7511  | 22.7589 | 3.3864  |
| 48 | H  | 11.3758 | 22.1147 | 2.9888  |
| 49 | H  | 12.4893 | 21.8868 | 5.4429  |
| 50 | C  | 11.8367 | 20.0634 | 7.8050  |
| 51 | C  | 12.7699 | 19.3765 | 8.5328  |
| 52 | C  | 13.4189 | 20.3102 | 9.4148  |
| 53 | C  | 12.8648 | 21.5431 | 9.2045  |

|    |   |         |         |         |
|----|---|---------|---------|---------|
| 54 | H | 11.1601 | 19.7346 | 7.0313  |
| 55 | H | 12.9823 | 18.3201 | 8.4395  |
| 56 | H | 14.2141 | 20.0926 | 10.1145 |
| 57 | H | 13.0710 | 22.5056 | 9.6471  |
| 58 | C | 6.1218  | 29.6799 | 8.8147  |
| 59 | C | 5.9200  | 30.4849 | 7.7259  |
| 60 | C | 7.2009  | 30.7515 | 7.1292  |
| 61 | C | 8.1521  | 30.1002 | 7.8667  |
| 62 | H | 5.4195  | 29.2527 | 9.5129  |
| 63 | H | 4.9588  | 30.8407 | 7.3811  |
| 64 | H | 7.3937  | 31.3510 | 6.2498  |
| 65 | H | 9.2239  | 30.0415 | 7.7587  |
| 66 | C | 8.0765  | 31.0878 | 11.3951 |
| 67 | C | 8.4267  | 31.6330 | 12.5995 |
| 68 | C | 8.9762  | 30.5844 | 13.4180 |
| 69 | C | 8.9454  | 29.4249 | 12.6921 |
| 70 | H | 7.6365  | 31.5324 | 10.5163 |
| 71 | H | 8.3035  | 32.6714 | 12.8758 |
| 72 | H | 9.3514  | 30.6823 | 14.4276 |
| 73 | H | 9.2861  | 28.4273 | 12.9282 |



Am-3

|      |         |         |         |
|------|---------|---------|---------|
| 1 H  | 6.6561  | 20.3686 | 9.2715  |
| 2 C  | 8.4784  | 21.3137 | 8.6035  |
| 3 H  | 8.8789  | 20.4291 | 8.1223  |
| 4 C  | 9.1871  | 22.5143 | 8.6029  |
| 5 C  | 7.0178  | 24.8961 | 10.3821 |
| 6 N  | 8.7342  | 23.6416 | 9.1871  |
| 7 C  | 7.5296  | 23.6170 | 9.7978  |
| 8 N  | 7.7467  | 26.0132 | 10.1724 |
| 9 C  | 7.2522  | 27.2017 | 10.5767 |
| 10 C | 6.0409  | 27.3297 | 11.2541 |
| 11 H | 5.6680  | 28.3008 | 11.5566 |
| 12 C | 5.3169  | 26.1708 | 11.5328 |
| 13 H | 4.3803  | 26.2220 | 12.0761 |
| 14 C | 5.8015  | 24.9483 | 11.0823 |
| 15 O | 10.3235 | 26.5150 | 11.9983 |
| 16 N | 10.2347 | 25.3351 | 12.4663 |
| 17 O | 10.1079 | 24.3880 | 11.6189 |
| 18 O | 10.2643 | 25.1123 | 13.6819 |
| 19 C | 6.7634  | 22.4412 | 9.8417  |
| 20 C | 7.2409  | 21.2807 | 9.2436  |
| 21 P | 8.2826  | 28.6654 | 10.0839 |
| 22 P | 10.8581 | 22.6647 | 7.8189  |
| 23 O | 11.3933 | 24.0462 | 8.2092  |
| 24 O | 9.5516  | 28.1058 | 9.4360  |
| 25 C | 10.6683 | 22.4435 | 6.0233  |
| 26 C | 9.4550  | 22.7564 | 5.3860  |

|    |   |         |         |         |
|----|---|---------|---------|---------|
| 27 | C | 9.3631  | 22.6946 | 3.9939  |
| 28 | C | 10.4782 | 22.3272 | 3.2335  |
| 29 | C | 11.6901 | 22.0211 | 3.8625  |
| 30 | C | 11.7889 | 22.0782 | 5.2535  |
| 31 | H | 8.5856  | 23.0489 | 5.9653  |
| 32 | H | 8.4237  | 22.9331 | 3.5058  |
| 33 | H | 10.4035 | 22.2796 | 2.1514  |
| 34 | H | 12.5556 | 21.7370 | 3.2725  |
| 35 | H | 12.7323 | 21.8398 | 5.7335  |
| 36 | C | 11.9345 | 21.3468 | 8.4620  |
| 37 | C | 12.8445 | 21.6783 | 9.4809  |
| 38 | C | 13.6644 | 20.6884 | 10.0279 |
| 39 | C | 13.5762 | 19.3709 | 9.5667  |
| 40 | C | 12.6722 | 19.0389 | 8.5508  |
| 41 | C | 11.8538 | 20.0234 | 7.9942  |
| 42 | H | 12.9160 | 22.7023 | 9.8323  |
| 43 | H | 14.3716 | 20.9465 | 10.8098 |
| 44 | H | 14.2151 | 18.6041 | 9.9941  |
| 45 | H | 12.6096 | 18.0184 | 8.1871  |
| 46 | H | 11.1702 | 19.7590 | 7.1936  |
| 47 | C | 8.6876  | 29.7052 | 11.5236 |
| 48 | C | 10.0374 | 29.7992 | 11.9007 |
| 49 | C | 10.4051 | 30.6119 | 12.9765 |
| 50 | C | 9.4307  | 31.3254 | 13.6803 |
| 51 | C | 8.0842  | 31.2336 | 13.3072 |
| 52 | C | 7.7104  | 30.4307 | 12.2283 |
| 53 | H | 10.7902 | 29.2451 | 11.3512 |

|    |    |         |         |         |
|----|----|---------|---------|---------|
| 54 | H  | 11.4500 | 30.6880 | 13.2606 |
| 55 | H  | 9.7189  | 31.9573 | 14.5149 |
| 56 | H  | 7.3288  | 31.7945 | 13.8480 |
| 57 | H  | 6.6667  | 30.3926 | 11.9337 |
| 58 | C  | 7.2849  | 29.6597 | 8.9289  |
| 59 | C  | 6.4123  | 29.0274 | 8.0246  |
| 60 | C  | 5.7469  | 29.7800 | 7.0552  |
| 61 | C  | 5.9517  | 31.1624 | 6.9793  |
| 62 | C  | 6.8231  | 31.7950 | 7.8718  |
| 63 | C  | 7.4908  | 31.0482 | 8.8448  |
| 64 | H  | 6.2495  | 27.9553 | 8.0707  |
| 65 | H  | 5.0717  | 29.2891 | 6.3618  |
| 66 | H  | 5.4326  | 31.7459 | 6.2250  |
| 67 | H  | 6.9840  | 32.8667 | 7.8117  |
| 68 | H  | 8.1673  | 31.5459 | 9.5308  |
| 69 | Am | 10.3175 | 25.8082 | 9.4331  |
| 70 | O  | 11.0013 | 26.7966 | 7.1162  |
| 71 | N  | 9.8977  | 26.5647 | 6.5216  |
| 72 | O  | 8.9936  | 25.9750 | 7.2013  |
| 73 | O  | 9.7126  | 26.8933 | 5.3452  |
| 74 | O  | 12.3831 | 27.3329 | 9.6776  |
| 75 | N  | 13.1562 | 26.5135 | 10.2817 |
| 76 | O  | 12.6809 | 25.3581 | 10.5213 |
| 77 | O  | 14.3021 | 26.8319 | 10.6134 |
| 78 | H  | 5.2327  | 24.0500 | 11.2773 |
| 79 | H  | 5.7985  | 22.4264 | 10.3281 |

Am-4

|      |         |         |         |
|------|---------|---------|---------|
| 1 H  | 6.6174  | 20.4000 | 9.2770  |
| 2 C  | 8.4410  | 21.3257 | 8.5867  |
| 3 H  | 8.7980  | 20.4558 | 8.0486  |
| 4 C  | 9.1771  | 22.5086 | 8.6161  |
| 5 C  | 7.1462  | 24.8608 | 10.5735 |
| 6 N  | 8.7813  | 23.6196 | 9.2695  |
| 7 C  | 7.6008  | 23.5961 | 9.9199  |
| 8 N  | 7.8395  | 25.9797 | 10.2923 |
| 9 C  | 7.3877  | 27.1593 | 10.7664 |
| 10 C | 6.2816  | 27.2800 | 11.6022 |
| 11 H | 5.9694  | 28.2455 | 11.9827 |
| 12 C | 5.5985  | 26.1110 | 11.9487 |
| 13 H | 4.7451  | 26.1497 | 12.6157 |
| 14 C | 6.0217  | 24.8991 | 11.4179 |
| 15 O | 10.4798 | 26.4688 | 12.0531 |
| 16 N | 10.3682 | 25.2893 | 12.5264 |
| 17 O | 10.2065 | 24.3497 | 11.6739 |
| 18 O | 10.4073 | 25.0644 | 13.7363 |
| 19 C | 6.8022  | 22.4402 | 9.9367  |
| 20 C | 7.2259  | 21.2964 | 9.2714  |
| 21 P | 8.3393  | 28.5941 | 10.1479 |
| 22 P | 10.8003 | 22.6666 | 7.7864  |
| 23 O | 11.4081 | 23.9929 | 8.1714  |
| 24 O | 9.6836  | 28.1338 | 9.6457  |
| 25 N | 10.5231 | 22.3989 | 6.1413  |
| 26 O | 12.7580 | 25.2143 | 10.4863 |

|       |         |         |         |
|-------|---------|---------|---------|
| 27 O  | 14.4140 | 26.6462 | 10.6127 |
| 28 H  | 5.4914  | 23.9923 | 11.6737 |
| 29 H  | 5.8507  | 22.4358 | 10.4499 |
| 30 Am | 10.4090 | 25.7665 | 9.5182  |
| 31 N  | 7.4531  | 29.3407 | 8.9118  |
| 32 O  | 11.0422 | 26.8146 | 7.2451  |
| 33 N  | 8.4027  | 29.7403 | 11.3918 |
| 34 N  | 9.9243  | 26.6140 | 6.6616  |
| 35 O  | 9.0249  | 26.0208 | 7.3500  |
| 36 N  | 11.8462 | 21.4068 | 8.2078  |
| 37 O  | 9.7219  | 26.9722 | 5.5012  |
| 38 O  | 12.4834 | 27.2374 | 9.7568  |
| 39 N  | 13.2568 | 26.3722 | 10.2965 |
| 40 C  | 11.7762 | 20.0584 | 7.8100  |
| 41 C  | 12.6868 | 19.3526 | 8.5484  |
| 42 C  | 13.3396 | 20.2719 | 9.4427  |
| 43 C  | 12.8098 | 21.5149 | 9.2291  |
| 44 H  | 11.1063 | 19.7437 | 7.0248  |
| 45 H  | 12.8817 | 18.2930 | 8.4546  |
| 46 H  | 14.1209 | 20.0383 | 10.1528 |
| 47 H  | 13.0259 | 22.4720 | 9.6785  |
| 48 C  | 9.3553  | 22.7803 | 5.4470  |
| 49 C  | 9.6220  | 22.7298 | 4.1078  |
| 50 C  | 10.9942 | 22.3270 | 3.9440  |
| 51 C  | 11.5314 | 22.1442 | 5.1875  |
| 52 H  | 8.4527  | 23.0398 | 5.9776  |
| 53 H  | 8.9132  | 22.9448 | 3.3201  |

|    |   |         |         |         |
|----|---|---------|---------|---------|
| 54 | H | 11.5176 | 22.1819 | 3.0086  |
| 55 | H | 12.5223 | 21.8505 | 5.4976  |
| 56 | C | 8.0729  | 31.1068 | 11.3112 |
| 57 | C | 8.4505  | 31.7019 | 12.4833 |
| 58 | C | 9.0437  | 30.6937 | 13.3218 |
| 59 | C | 9.0121  | 29.5079 | 12.6398 |
| 60 | H | 7.5975  | 31.5103 | 10.4310 |
| 61 | H | 8.3173  | 32.7475 | 12.7255 |
| 62 | H | 9.4474  | 30.8345 | 14.3151 |
| 63 | H | 9.3753  | 28.5251 | 12.9026 |
| 64 | C | 6.0655  | 29.5532 | 8.8441  |
| 65 | C | 5.8079  | 30.3126 | 7.7345  |
| 66 | C | 7.0622  | 30.5939 | 7.0899  |
| 67 | C | 8.0538  | 29.9973 | 7.8207  |
| 68 | H | 5.3984  | 29.1299 | 9.5787  |
| 69 | H | 4.8270  | 30.6277 | 7.4058  |
| 70 | H | 7.2105  | 31.1650 | 6.1834  |
| 71 | H | 9.1233  | 29.9645 | 7.6821  |

# Eu-1

|      |         |         |         |
|------|---------|---------|---------|
| 1 H  | 6.6763  | 20.3432 | 9.3848  |
| 2 C  | 8.4845  | 21.2597 | 8.6750  |
| 3 H  | 8.8812  | 20.3531 | 8.2330  |
| 4 C  | 9.2086  | 22.4657 | 8.6170  |
| 5 C  | 7.0453  | 24.8781 | 10.2845 |
| 6 N  | 8.7696  | 23.6092 | 9.1474  |
| 7 C  | 7.5593  | 23.6230 | 9.7598  |
| 8 N  | 7.7821  | 26.0082 | 10.1344 |
| 9 C  | 7.2627  | 27.1753 | 10.5260 |
| 10 C | 6.0013  | 27.2866 | 11.1409 |
| 11 H | 5.6123  | 28.2525 | 11.4397 |
| 12 C | 5.2613  | 26.1385 | 11.3443 |
| 13 H | 4.2875  | 26.1845 | 11.8203 |
| 14 C | 5.7625  | 24.8960 | 10.8990 |
| 15 C | 5.0060  | 23.6808 | 11.0268 |
| 16 H | 4.0373  | 23.7252 | 11.5136 |
| 17 C | 5.4849  | 22.5067 | 10.5319 |
| 18 H | 4.9072  | 21.5919 | 10.6144 |
| 19 C | 6.7613  | 22.4509 | 9.8741  |
| 20 C | 7.2607  | 21.2544 | 9.3142  |
| 21 P | 8.3100  | 28.6495 | 10.0993 |
| 22 P | 10.8735 | 22.5924 | 7.8149  |
| 23 O | 11.4239 | 23.9788 | 8.1648  |
| 24 O | 9.5866  | 28.1093 | 9.4496  |
| 25 C | 10.6542 | 22.3325 | 6.0277  |
| 26 C | 9.4252  | 22.6154 | 5.4068  |

|    |   |         |         |         |
|----|---|---------|---------|---------|
| 27 | C | 9.3074  | 22.5188 | 4.0183  |
| 28 | C | 10.4123 | 22.1471 | 3.2456  |
| 29 | C | 11.6399 | 21.8707 | 3.8583  |
| 30 | C | 11.7643 | 21.9617 | 5.2455  |
| 31 | H | 8.5633  | 22.9119 | 5.9951  |
| 32 | H | 8.3558  | 22.7342 | 3.5431  |
| 33 | H | 10.3178 | 22.0732 | 2.1665  |
| 34 | H | 12.4975 | 21.5831 | 3.2586  |
| 35 | H | 12.7193 | 21.7453 | 5.7131  |
| 36 | C | 11.9431 | 21.2773 | 8.4736  |
| 37 | C | 12.8635 | 21.6147 | 9.4809  |
| 38 | C | 13.6735 | 20.6237 | 10.0405 |
| 39 | C | 13.5649 | 19.2996 | 9.6032  |
| 40 | C | 12.6509 | 18.9617 | 8.5982  |
| 41 | C | 11.8418 | 19.9470 | 8.0296  |
| 42 | H | 12.9501 | 22.6436 | 9.8139  |
| 43 | H | 14.3887 | 20.8859 | 10.8136 |
| 44 | H | 14.1959 | 18.5319 | 10.0406 |
| 45 | H | 12.5728 | 17.9360 | 8.2528  |
| 46 | H | 11.1497 | 19.6784 | 7.2378  |
| 47 | C | 8.6985  | 29.6417 | 11.5766 |
| 48 | C | 10.0497 | 29.7651 | 11.9393 |
| 49 | C | 10.4063 | 30.5475 | 13.0410 |
| 50 | C | 9.4194  | 31.2009 | 13.7846 |
| 51 | C | 8.0712  | 31.0780 | 13.4266 |
| 52 | C | 7.7081  | 30.3053 | 12.3224 |
| 53 | H | 10.8123 | 29.2576 | 11.3592 |



|    |    |         |         |         |
|----|----|---------|---------|---------|
| 54 | H  | 11.4521 | 30.6467 | 13.3144 |
| 55 | H  | 9.6990  | 31.8095 | 14.6392 |
| 56 | H  | 7.3055  | 31.5902 | 14.0003 |
| 57 | H  | 6.6616  | 30.2422 | 12.0426 |
| 58 | C  | 7.3264  | 29.6751 | 8.9601  |
| 59 | C  | 6.5067  | 29.0589 | 7.9967  |
| 60 | C  | 5.8486  | 29.8343 | 7.0408  |
| 61 | C  | 6.0083  | 31.2248 | 7.0367  |
| 62 | C  | 6.8262  | 31.8419 | 7.9886  |
| 63 | C  | 7.4863  | 31.0719 | 8.9490  |
| 64 | H  | 6.3805  | 27.9808 | 7.9859  |
| 65 | H  | 5.2146  | 29.3548 | 6.3020  |
| 66 | H  | 5.4957  | 31.8264 | 6.2924  |
| 67 | H  | 6.9518  | 32.9200 | 7.9842  |
| 68 | H  | 8.1211  | 31.5584 | 9.6815  |
| 69 | Eu | 10.3927 | 25.8110 | 9.3738  |
| 70 | O  | 11.0545 | 26.8271 | 7.0355  |
| 71 | N  | 9.9499  | 26.5847 | 6.4451  |
| 72 | O  | 9.0526  | 25.9863 | 7.1259  |
| 73 | O  | 9.7583  | 26.9130 | 5.2700  |
| 74 | O  | 12.4931 | 27.3617 | 9.6140  |
| 75 | N  | 13.2748 | 26.5332 | 10.1909 |
| 76 | O  | 12.8102 | 25.3688 | 10.4119 |
| 77 | O  | 14.4235 | 26.8491 | 10.5171 |
| 78 | O  | 10.4341 | 26.4703 | 11.9431 |
| 79 | N  | 10.3654 | 25.2869 | 12.4104 |
| 80 | O  | 10.2392 | 24.3400 | 11.5638 |

81 O      10.4148 25.0648 13.6244

## Eu-2

|      |         |         |         |
|------|---------|---------|---------|
| 1 H  | 6.7145  | 20.3117 | 9.5066  |
| 2 C  | 8.4903  | 21.2318 | 8.7216  |
| 3 H  | 8.8646  | 20.3311 | 8.2500  |
| 4 C  | 9.2090  | 22.4383 | 8.6485  |
| 5 C  | 7.1322  | 24.8395 | 10.4277 |
| 6 N  | 8.8009  | 23.5786 | 9.2128  |
| 7 C  | 7.6206  | 23.5864 | 9.8734  |
| 8 N  | 7.8546  | 25.9663 | 10.2343 |
| 9 C  | 7.3576  | 27.1282 | 10.6729 |
| 10 C | 6.1582  | 27.2364 | 11.3964 |
| 11 H | 5.8198  | 28.1962 | 11.7690 |
| 12 C | 5.4257  | 26.0849 | 11.6256 |
| 13 H | 4.4938  | 26.1242 | 12.1788 |
| 14 C | 5.8866  | 24.8527 | 11.1177 |
| 15 C | 5.1363  | 23.6352 | 11.2700 |
| 16 H | 4.1964  | 23.6740 | 11.8101 |
| 17 C | 5.5840  | 22.4673 | 10.7340 |
| 18 H | 5.0073  | 21.5537 | 10.8341 |
| 19 C | 6.8262  | 22.4138 | 10.0116 |
| 20 C | 7.2960  | 21.2230 | 9.4181  |
| 21 P | 8.3515  | 28.5756 | 10.1504 |
| 22 P | 10.8143 | 22.5886 | 7.7818  |
| 23 O | 11.4257 | 23.9244 | 8.1287  |
| 24 O | 9.7027  | 28.1157 | 9.6661  |
| 25 N | 10.4957 | 22.2963 | 6.1483  |
| 26 O | 9.0698  | 26.0479 | 7.2790  |

|    |    |         |         |         |
|----|----|---------|---------|---------|
| 27 | O  | 12.5773 | 27.2641 | 9.7049  |
| 28 | N  | 13.3576 | 26.3834 | 10.2030 |
| 29 | O  | 12.8657 | 25.2181 | 10.3707 |
| 30 | O  | 14.5224 | 26.6467 | 10.5044 |
| 31 | O  | 9.7594  | 27.0002 | 5.4296  |
| 32 | O  | 10.5416 | 26.3980 | 12.0132 |
| 33 | N  | 10.4529 | 25.2098 | 12.4728 |
| 34 | O  | 10.2963 | 24.2777 | 11.6126 |
| 35 | O  | 10.5127 | 24.9730 | 13.6791 |
| 36 | N  | 11.8711 | 21.3378 | 8.1992  |
| 37 | O  | 11.0916 | 26.8362 | 7.1626  |
| 38 | N  | 9.9685  | 26.6392 | 6.5880  |
| 39 | N  | 7.5188  | 29.3915 | 8.9212  |
| 40 | N  | 8.3975  | 29.6671 | 11.4433 |
| 41 | Eu | 10.4664 | 25.7618 | 9.4604  |
| 42 | C  | 9.2940  | 22.6258 | 5.4861  |
| 43 | C  | 9.5181  | 22.5559 | 4.1400  |
| 44 | C  | 10.8972 | 22.1959 | 3.9385  |
| 45 | C  | 11.4800 | 22.0550 | 5.1668  |
| 46 | H  | 8.4007  | 22.8661 | 6.0410  |
| 47 | H  | 8.7772  | 22.7313 | 3.3726  |
| 48 | H  | 11.3944 | 22.0493 | 2.9892  |
| 49 | H  | 12.4897 | 21.7994 | 5.4496  |
| 50 | C  | 11.7950 | 19.9853 | 7.8149  |
| 51 | C  | 12.7125 | 19.2854 | 8.5501  |
| 52 | C  | 13.3755 | 20.2120 | 9.4292  |
| 53 | C  | 12.8457 | 21.4538 | 9.2091  |

|      |         |         |         |
|------|---------|---------|---------|
| 54 H | 11.1153 | 19.6649 | 7.0404  |
| 55 H | 12.9048 | 18.2246 | 8.4644  |
| 56 H | 14.1636 | 19.9838 | 10.1335 |
| 57 H | 13.0688 | 22.4147 | 9.6467  |
| 58 C | 6.1421  | 29.6598 | 8.8280  |
| 59 C | 5.9427  | 30.4771 | 7.7479  |
| 60 C | 7.2237  | 30.7407 | 7.1500  |
| 61 C | 8.1724  | 30.0745 | 7.8771  |
| 62 H | 5.4388  | 29.2306 | 9.5240  |
| 63 H | 4.9830  | 30.8435 | 7.4100  |
| 64 H | 7.4179  | 31.3478 | 6.2762  |
| 65 H | 9.2434  | 30.0084 | 7.7650  |
| 66 C | 8.0967  | 31.0422 | 11.4107 |
| 67 C | 8.4447  | 31.5790 | 12.6195 |
| 68 C | 8.9915  | 30.5247 | 13.4324 |
| 69 C | 8.9607  | 29.3697 | 12.6991 |
| 70 H | 7.6595  | 31.4931 | 10.5337 |
| 71 H | 8.3224  | 32.6158 | 12.9020 |
| 72 H | 9.3650  | 30.6158 | 14.4432 |
| 73 H | 9.2994  | 28.3701 | 12.9298 |

### Eu-3

|      |         |         |         |
|------|---------|---------|---------|
| 1 H  | 6.6368  | 20.3668 | 9.2978  |
| 2 C  | 8.4685  | 21.2875 | 8.6232  |
| 3 H  | 8.8441  | 20.4024 | 8.1236  |
| 4 C  | 9.1984  | 22.4759 | 8.6305  |
| 5 C  | 7.1058  | 24.8642 | 10.4891 |
| 6 N  | 8.7746  | 23.5993 | 9.2410  |
| 7 C  | 7.5812  | 23.5869 | 9.8708  |
| 8 N  | 7.8263  | 25.9807 | 10.2483 |
| 9 C  | 7.3583  | 27.1676 | 10.6848 |
| 10 C | 6.1875  | 27.2962 | 11.4301 |
| 11 H | 5.8422  | 28.2659 | 11.7683 |
| 12 C | 5.4751  | 26.1373 | 11.7391 |
| 13 H | 4.5720  | 26.1875 | 12.3366 |
| 14 C | 5.9300  | 24.9158 | 11.2555 |
| 15 O | 10.4779 | 26.3927 | 12.0879 |
| 16 N | 10.3858 | 25.2047 | 12.5401 |
| 17 O | 10.2412 | 24.2727 | 11.6805 |
| 18 O | 10.4281 | 24.9659 | 13.7512 |
| 19 C | 6.7904  | 22.4268 | 9.9030  |
| 20 C | 7.2385  | 21.2681 | 9.2787  |
| 21 P | 8.3733  | 28.6316 | 10.1580 |
| 22 P | 10.8546 | 22.6159 | 7.8159  |
| 23 O | 11.4431 | 23.9639 | 8.2462  |
| 24 O | 9.7086  | 28.0888 | 9.6423  |
| 25 C | 10.6153 | 22.4670 | 6.0182  |
| 26 C | 9.3864  | 22.7983 | 5.4222  |

|    |   |         |         |         |
|----|---|---------|---------|---------|
| 27 | C | 9.2568  | 22.7726 | 4.0316  |
| 28 | C | 10.3501 | 22.4242 | 3.2320  |
| 29 | C | 11.5783 | 22.1011 | 3.8200  |
| 30 | C | 11.7143 | 22.1215 | 5.2087  |
| 31 | H | 8.5327  | 23.0750 | 6.0317  |
| 32 | H | 8.3047  | 23.0237 | 3.5754  |
| 33 | H | 10.2457 | 22.4035 | 2.1515  |
| 34 | H | 12.4271 | 21.8308 | 3.1999  |
| 35 | H | 12.6692 | 21.8674 | 5.6570  |
| 36 | C | 11.9081 | 21.2399 | 8.3702  |
| 37 | C | 12.8688 | 21.4970 | 9.3630  |
| 38 | C | 13.6773 | 20.4584 | 9.8319  |
| 39 | C | 13.5264 | 19.1660 | 9.3187  |
| 40 | C | 12.5706 | 18.9076 | 8.3293  |
| 41 | C | 11.7644 | 19.9413 | 7.8502  |
| 42 | H | 12.9888 | 22.5017 | 9.7541  |
| 43 | H | 14.4242 | 20.6596 | 10.5929 |
| 44 | H | 14.1565 | 18.3608 | 9.6842  |
| 45 | H | 12.4592 | 17.9066 | 7.9254  |
| 46 | H | 11.0418 | 19.7348 | 7.0674  |
| 47 | C | 8.6091  | 29.7637 | 11.5627 |
| 48 | C | 9.8609  | 29.7850 | 12.1999 |
| 49 | C | 10.0741 | 30.6415 | 13.2829 |
| 50 | C | 9.0421  | 31.4696 | 13.7355 |
| 51 | C | 7.7938  | 31.4502 | 13.1024 |
| 52 | C | 7.5760  | 30.6041 | 12.0139 |
| 53 | H | 10.6600 | 29.1439 | 11.8450 |

|    |    |         |         |         |
|----|----|---------|---------|---------|
| 54 | H  | 11.0441 | 30.6625 | 13.7693 |
| 55 | H  | 9.2114  | 32.1350 | 14.5766 |
| 56 | H  | 6.9953  | 32.0990 | 13.4478 |
| 57 | H  | 6.6128  | 30.6168 | 11.5139 |
| 58 | C  | 7.4265  | 29.5130 | 8.8757  |
| 59 | C  | 6.4651  | 28.8495 | 8.0939  |
| 60 | C  | 5.8352  | 29.5225 | 7.0441  |
| 61 | C  | 6.1645  | 30.8531 | 6.7665  |
| 62 | C  | 7.1266  | 31.5159 | 7.5369  |
| 63 | C  | 7.7573  | 30.8506 | 8.5893  |
| 64 | H  | 6.2027  | 27.8163 | 8.2960  |
| 65 | H  | 5.0902  | 29.0082 | 6.4456  |
| 66 | H  | 5.6721  | 31.3740 | 5.9508  |
| 67 | H  | 7.3839  | 32.5481 | 7.3212  |
| 68 | H  | 8.5007  | 31.3720 | 9.1835  |
| 69 | Eu | 10.4433 | 25.7707 | 9.5068  |
| 70 | O  | 11.1462 | 26.8292 | 7.1967  |
| 71 | N  | 10.0428 | 26.6197 | 6.5925  |
| 72 | O  | 9.1257  | 26.0313 | 7.2560  |
| 73 | O  | 9.8696  | 26.9687 | 5.4207  |
| 74 | O  | 12.5853 | 27.2640 | 9.7737  |
| 75 | N  | 13.3398 | 26.4082 | 10.3462 |
| 76 | O  | 12.8398 | 25.2570 | 10.5595 |
| 77 | O  | 14.4973 | 26.6867 | 10.6765 |
| 78 | H  | 5.3737  | 24.0164 | 11.4803 |
| 79 | H  | 5.8296  | 22.4240 | 10.3983 |



#### Eu-4

|    |   |         |         |         |
|----|---|---------|---------|---------|
| 1  | H | 6.6118  | 20.3638 | 9.2506  |
| 2  | C | 8.4458  | 21.2841 | 8.5802  |
| 3  | H | 8.8068  | 20.4134 | 8.0462  |
| 4  | C | 9.1824  | 22.4666 | 8.6171  |
| 5  | C | 7.1384  | 24.8216 | 10.5591 |
| 6  | N | 8.7842  | 23.5779 | 9.2670  |
| 7  | C | 7.5987  | 23.5573 | 9.9063  |
| 8  | N | 7.8384  | 25.9423 | 10.3014 |
| 9  | C | 7.3787  | 27.1175 | 10.7793 |
| 10 | C | 6.2491  | 27.2326 | 11.5847 |
| 11 | H | 5.9249  | 28.1951 | 11.9622 |
| 12 | C | 5.5582  | 26.0620 | 11.9067 |
| 13 | H | 4.6875  | 26.0961 | 12.5511 |
| 14 | C | 5.9967  | 24.8540 | 11.3808 |
| 15 | O | 10.4849 | 26.4144 | 12.0478 |
| 16 | N | 10.4281 | 25.2266 | 12.5148 |
| 17 | O | 10.3076 | 24.2841 | 11.6606 |
| 18 | O | 10.4798 | 25.0016 | 13.7240 |
| 19 | C | 6.7958  | 22.4034 | 9.9119  |
| 20 | C | 7.2233  | 21.2583 | 9.2517  |
| 21 | P | 8.3293  | 28.5639 | 10.1846 |
| 22 | P | 10.8102 | 22.6216 | 7.7949  |
| 23 | O | 11.4306 | 23.9403 | 8.1889  |
| 24 | O | 9.6670  | 28.1116 | 9.6556  |
| 25 | N | 10.5369 | 22.3683 | 6.1474  |
| 26 | O | 12.8523 | 25.2711 | 10.4393 |

|    |    |         |         |         |
|----|----|---------|---------|---------|
| 27 | O  | 14.4809 | 26.7327 | 10.5600 |
| 28 | H  | 5.4607  | 23.9458 | 11.6188 |
| 29 | H  | 5.8386  | 22.4000 | 10.4142 |
| 30 | Eu | 10.4498 | 25.7647 | 9.5009  |
| 31 | N  | 7.4617  | 29.3509 | 8.9588  |
| 32 | O  | 11.0489 | 26.8155 | 7.1831  |
| 33 | N  | 8.3564  | 29.6824 | 11.4521 |
| 34 | N  | 9.9405  | 26.5566 | 6.6043  |
| 35 | O  | 9.0583  | 25.9526 | 7.3051  |
| 36 | N  | 11.8488 | 21.3539 | 8.2102  |
| 37 | O  | 9.7295  | 26.8743 | 5.4334  |
| 38 | O  | 12.5322 | 27.2973 | 9.7301  |
| 39 | N  | 13.3245 | 26.4414 | 10.2530 |
| 40 | C  | 11.7700 | 20.0085 | 7.8038  |
| 41 | C  | 12.6775 | 19.2923 | 8.5359  |
| 42 | C  | 13.3373 | 20.2018 | 9.4351  |
| 43 | C  | 12.8151 | 21.4493 | 9.2300  |
| 44 | H  | 11.0966 | 19.7027 | 7.0180  |
| 45 | H  | 12.8654 | 18.2321 | 8.4351  |
| 46 | H  | 14.1185 | 19.9590 | 10.1424 |
| 47 | H  | 13.0388 | 22.4021 | 9.6844  |
| 48 | C  | 9.3647  | 22.7358 | 5.4530  |
| 49 | C  | 9.6304  | 22.6833 | 4.1138  |
| 50 | C  | 11.0068 | 22.2951 | 3.9499  |
| 51 | C  | 11.5466 | 22.1199 | 5.1933  |
| 52 | H  | 8.4604  | 22.9890 | 5.9837  |
| 53 | H  | 8.9187  | 22.8890 | 3.3264  |

|    |   |         |         |         |
|----|---|---------|---------|---------|
| 54 | H | 11.5307 | 22.1534 | 3.0143  |
| 55 | H | 12.5405 | 21.8364 | 5.5034  |
| 56 | C | 8.3418  | 31.0858 | 11.3117 |
| 57 | C | 8.7071  | 31.6347 | 12.5088 |
| 58 | C | 8.9821  | 30.5589 | 13.4253 |
| 59 | C | 8.7758  | 29.3806 | 12.7641 |
| 60 | H | 8.0606  | 31.5448 | 10.3771 |
| 61 | H | 8.7649  | 32.6940 | 12.7195 |
| 62 | H | 9.2925  | 30.6523 | 14.4570 |
| 63 | H | 8.8935  | 28.3570 | 13.0862 |
| 64 | C | 6.1218  | 29.7718 | 8.9804  |
| 65 | C | 5.8486  | 30.3756 | 7.7821  |
| 66 | C | 7.0458  | 30.3386 | 6.9858  |
| 67 | C | 8.0170  | 29.7096 | 7.7166  |
| 68 | H | 5.4927  | 29.5987 | 9.8400  |
| 69 | H | 4.8951  | 30.7989 | 7.4977  |
| 70 | H | 7.1720  | 30.7324 | 5.9867  |
| 71 | H | 9.0489  | 29.4877 | 7.4950  |
